# Supplementary material
Source: PubMed Central journal article supplement (PMC3748976)
Supplement: jbjs_95_7_633_ds01.pdf [file jbjs_95_7_633_ds01.pdf]

**TABLE E-1 Demographic Characteristics of the Study Population**

| Variable                                                | Fracture Group (N = 40) | Control Group (N = 80) | P Value |
|---------------------------------------------------------|-------------------------|------------------------|---------|
| Age* (yr)                                               | 29.8 ± 8.0              | 28.5 ± 6.3             | 0.37    |
| Body mass index* ( kg/m <sup>2</sup> )                  | 25.8 ± 6.7              | 25.2 ± 5.0             | 0.63    |
| Race (no. of patients)                                  |                         |                        | 0.92    |
| White                                                   | 28 (70%)                | 63 (79%)               |         |
| Black                                                   | 3 (8%)                  | 6 (8%)                 |         |
| Hispanic                                                | 5 (13%)                 | 7 (9%)                 |         |
| Asian                                                   | 4 (10%)                 | 4 (5%)                 |         |
| Hand dominance (no. of patients)                        |                         |                        | 0.98    |
| Right                                                   | 36 (90%)                | 73 (91%)               |         |
| Left                                                    | 4 (10%)                 | 7 (9%)                 |         |
| History of fracture (no. of patients)                   | 13 (33%)                | 15 (19%)               | 0.11    |
| Smokers (no. of patients)                               | 2 (5%)                  | 3 (4%)                 | 0.99    |
| Vitamin D supplementation (no. of patients)             | 6 (15%)                 | 15 (19%)               | 0.80    |
| Calcium supplementation (no. of patients)               | 7 (18%)                 | 14 (18%)               | 0.99    |
| Hormonal contraception (no. of patients)                | 15 (38%)                | 44 (55%)               | 0.08    |
| Age at menarche* (yr)                                   | 12.8 ± 1.5              | 12.8 ± 1.4             | 0.99    |
| Median no. of pregnancies (range)                       | 0 (0-5)                 | 0 (0-5)                | 0.68    |
| Median no. of births (range)                            | 0 (0-3)                 | 0 (0-4)                | 0.39    |
| Mean no. of cups of coffee per day (range)              | 1 (0-5)                 | 1 (0-5)                | 0.74    |
| Median level of physical activity (range)               | 2 (0-3)                 | 2 (0-3)                | 0.18    |
| Side with fracture (no. of patients)                    |                         |                        |         |
| Dominant                                                | 22 (55%)                |                        |         |
| Nondominant                                             | 18 (45%)                |                        |         |
| Fracture classification <sup>27</sup> (no. of patients) |                         |                        |         |
| A                                                       | 12 (30%)                |                        |         |
| B                                                       | 2 (5%)                  |                        |         |
| C                                                       | 26 (65%)                |                        |         |
| Operative treatment (no. of patients)                   | 15 (38%)                |                        |         |

\*The values are given as the mean and the standard deviation.
